apparent history of *Sagitta*, like other forms of holoplankton, is a simple one. From the egg to the last phase it is borne by tidal and ocean currents, journeying hopefully onward without knowing where it is to arrive. The early feeding stages and the immature are dispersed, and this phase is indicated by the small numbers captured in the plankton nets. Then at certain periods of the year a congregation takes place of the mature and spawning occurs, and at these seasons the numbers recorded present a marked increase. The spawning behaviour indicates that the individuals are attracted to a zone of the current and it must necessarily be periodic.

The diagram which Mr. Russell gives of the history of *Sagitta setosa* for the first five months of 1932 is a continuation of a previous diagram in a previous paper and both illustrate these points clearly. Each year about May he got a pure sample of mature, and this was preceded by and succeeded by the occurrence of immature and small specimens. There is an indication of spawning by congregation and the condition of the specimens in or about September. A further factor therefore appears to control the event of the spawning and it is that while maturity is indicated by the condition of the gonads spawning does not take place until assembling has at all events begun. The remarkable feature is the apparent disappearance or almost complete disappearance of the young stages from the spawning zone. So complete a dispersion of the young was not seen in the case of *Sagitta elegans*, but still the results show that their numbers undergo a diminution. It is such cross-current migrations which make it difficult, as Mr. Russell has found, to arrive at data with regard to growth. It may be said also that it is this periodicity of events which controls seasonal abundance.

For the purpose of giving a picture of the vertical distribution of *Sagitta* Mr. Russell has examined collections made in 1926 and these indicate incidentally that, like the North Sea, the Channel was invaded by *Sagitta setosa* in that year. An attempt is made also to correlate the results with determinations of light intensity made at Plymouth. These species, like so many other forms, have their diurnal ups and downs and we have been content to regard the movement (which should not be termed a migration) as being a response to daily light changes. The fact is, however, that the movement is subject to individual variation, and all that can be said is that the young stages are more common at the surface and that *Sagitta setosa* tends to be more superficial in distribution than *S. elegans*.

A. M.

**E. Fischer-Piette.** "Répartition des principales espèces fixées sur les rochers battus des côtes et des îles de la Manche, de Lannion à Fécamp." Ann. de l'Inst. Océanogr. N. S., Tome XII, Fasc. IV. Paris 1932.

Die Arbeit enthält eine vergleichend-ökologische Übersicht über die Besiedelung an steilen, dem Wellenschlag ausgesetzten Felsen der Gezeitenzone. Die französische Küste am Kanal-Eingang wurde von Saint Malo aus nach Westen bis Roscoff und nach Osten bis Fécamp untersucht, ausserdem wurden die Anglo-Normannischen Inseln einbezogen. Im Ganzen wurde auf 60 Stationen beobachtet, die Daten sind alle vom Verfasser selbst gesammelt, sodass sie sich sehr gut vergleichen lassen, obwohl keine quantitativen Angaben gemacht werden. Die Grundlage bildet eine sorgfältige Einzelbeschreibung der Stationen mit ihren Standortsfaktoren und der Verteilung der Organismen auf die 3 unterschiedenen Vertikalstufen der Steilküste. Dann werden etwa 30 häufige Arten einzeln behandelt hinsichtlich ihrer Frequenz

und Abundanz. Dabei werden viele interessante Einzelheiten mitgeteilt, auf die wir hier nicht eingehen können, es sei nur auf einige Arten hingewiesen. Wir erfahren z. B., dass die Fucaceen an der exponierten Steilküste fehlen und dafür Cirripeden, Flechten und Rotalgen stark entwickelt sind. Über die Ökologie von *Himantalia lorea*, der drei gut unterschiedenen *Patella*-Arten mit ihren Standortmodifikationen, der Cirripeden *Chthamalus stellatus*, *Balanus balanoides*, *B. perforatus*, *B. crenatus*, *Verruca strömia* und verschiedener Flechten und Rotalgen werden interessante Ergebnisse mitgeteilt. Der Einfluss der Gesteinsbeschaffenheit auf die Küstenform und auf die Besiedelung kann anschaulich gezeigt werden, da der westliche Teil des Untersuchungsgebietes aus Eruptivgestein besteht und im Osten die Sedimentgesteine des Pariser Beckens an die Küste herantreten. Andere Faktoren sind der Wellenschlag, die Tageszeit des Springniedrigwassers (Hafenzeit), der Gehalt des Wassers an gelöster organischer Substanz, die Feuchtigkeit, Benennung u. a. m. Einige Arten zeigen eine geordnete Verteilung der Häufigkeit, welche noch nicht hinreichend erklärt werden kann. Verf. vermutet, dass hierbei auch die Biologie der Larven eine Rolle spielt, welche noch nicht näher untersucht wurde.

Die Arbeit ist ein anregender und wertvoller Beitrag zur Frage, welche Faktoren die Verbreitung und die Häufigkeit der Organismen an der Meeresküste bestimmen.

Hagmeier.

**H. Blegvad.** "Preliminary Report on the Danish Experimental Transplantations of Plaice from the North Sea to the Belt Sea during the Years 1928—31". Rep. Danish Biological Station XXXVII, 1932. Copenhagen, 1932.

Der Rückgang der Schollenfischerei in Kattegat und Beltsee veranlasste die dänische Regierung, durch grosszügige Versuche die Möglichkeit zu prüfen, ob durch Verpflanzung von Nordsee-Schollen in diese Gewässer der gesunkene Fischereiertrag wieder gehoben werden könne. In den Jahren 1928 bis 1931 wurden insgesamt 3,600,000 Schollen im Gewicht von 312,000 kg. im südlichen Kattegat und in der Beltsee ausgesetzt. Da sich beim ersten Versuche kein Unterschied zwischen Schollen aus dem Limfjord und solchen aus der Nordsee ergab, wurden zu den späteren Versuchen des kürzeren Transportes wegen ausschliesslich Nordsee-Schollen aus dem Horns Riff-Gebiet verwendet. Es erwies sich als zweckmässig, die Tiere nach dem Fange 3 Tage in Esbjerg zu hältern, damit sie den Darm entleerten und vor Verletzungen durch scharfkantige Muschelbruchstücke bewahrt blieben. Dann wurden sie im Kraftwagen nach Fredericia transportiert, wo sie nochmals 2 Tage lang in Fischbehältern gehegt wurden, bevor man sie an die Aussetzungsplätze brachte. Bei jedem Versuche wurden 2—3000 transplantierte Nordsee-Schollen und zugleich eine grössere Zahl einheimischer Schollen markiert. Die Leitung der Arbeiten lag in den Händen von Fischereidirektor M o r t e n s e n; die wissenschaftlichen Untersuchungen wurden in Zusammenarbeit mit der Dänischen Biologischen Station ausgeführt.

Der Prozentsatz der wiedergefangenen Tiere war normalerweise bei den einheimischen Schollen grösser als bei den verpflanzten Fischen, von denen doch offenbar ein Teil durch den Transport geschädigt worden war. So erhielt man nach dem 1929 vorgenommenen Versuche bis Ende 1931 60 % der Beltsee-Schollen, dagegen nur 32 % der Nordsee-Schollen zurück. Von den 1931 markierten Fischen wurden relativ mehr transplantierte als einheimische Exemplare wiedergefangen — 34 % gegen 24 % bis Januar 1932. Dies mag
